# Supplementary material for: Snowfall-albedo feedbacks could have led to deglaciation of snowball Earth starting from mid-latitudes
Source: Springer Nature journal article supplement (doi:10.1038/s43247-021-00160-4), 2021-05-14
Supplement: 43247_2021_160_MOESM1_ESM.pdf [file 43247_2021_160_MOESM1_ESM.pdf]

# Supporting Material: Snowfall-albedo feedbacks could have led to deglaciation of Snowball Earth starting from mid-latitudes

**Philipp de Vrese<sup>1,\*</sup>, Tobias Stacke<sup>2</sup>, Jeremy Caves Rugestein<sup>3</sup>, Jason Goodman<sup>4</sup>, and Victor Brovkin<sup>1,5</sup>**

<sup>1</sup>Max Planck Institute for Meteorology, The Land in the Earth System, Hamburg, 20146, Germany

<sup>2</sup>Helmholtz-Zentrum Geesthacht, Institute of Coastal Research, Geesthacht, 21502, Germany

<sup>3</sup>Colorado State University, Department of Geosciences, Fort Collins, 80521, USA

<sup>4</sup>Wheaton College, Department of Physics and Astronomy, Norton, 02766, USA

<sup>5</sup>University of Hamburg, Center for Earth System Research and Sustainability, Hamburg, 20146, Germany

\*philipp.de-vrese@mpimet.mpg.de

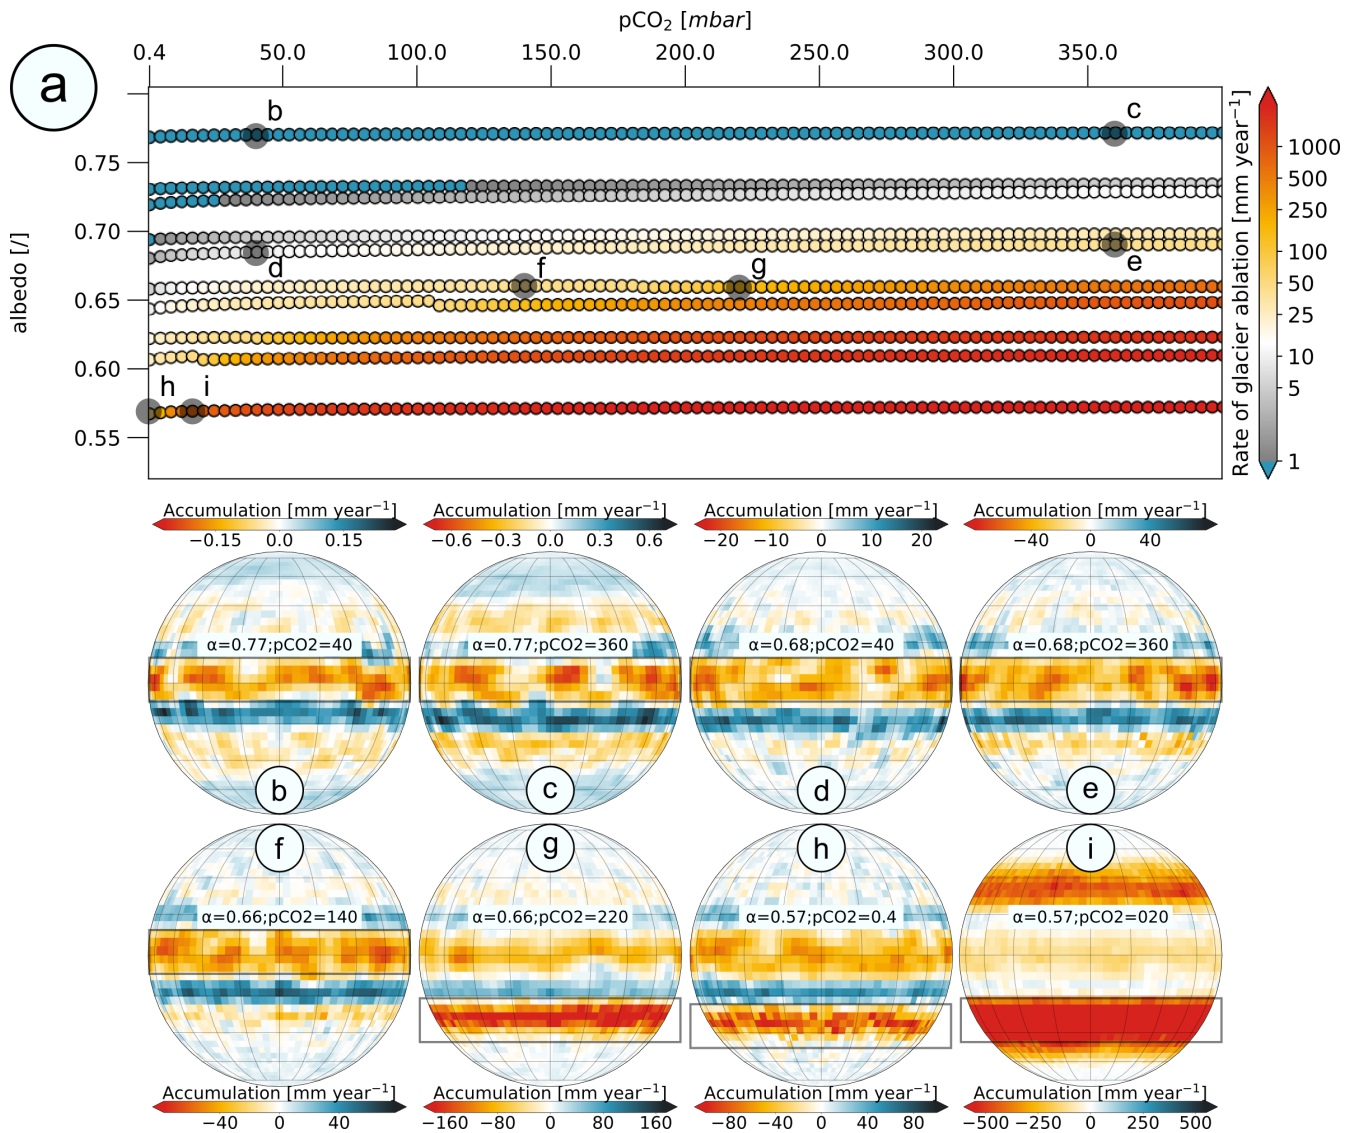

**Supplementary Figure 1. Dependency of maximum ablation rates on surface albedo and atmospheric CO<sub>2</sub> concentrations**

**a)** Simulated annual mean glacier ablation rates as a function of atmospheric CO<sub>2</sub> concentration (pCO<sub>2</sub>) and surface albedo ( $\alpha$ ). Rates show the average over the 18.75°-wide latitudinal band (about 2000 km) in which maximum ablation rates were simulated. Grey circles indicate the combinations of  $\alpha$  and pCO<sub>2</sub> that are presented in detail in sub-plots *b-i*. **b)** Rate of glacier accumulation simulated for  $\alpha = 0.77$  and pCO<sub>2</sub> = 40 mbar. **c)** same as *b* but for pCO<sub>2</sub> = 360 mbar. **d)** same as *b* but for  $\alpha = 0.68$  and pCO<sub>2</sub> = 40 mbar. **e)** same as *d* but for pCO<sub>2</sub> = 360 mbar. **f)** same as *b* but for  $\alpha = 0.66$  and pCO<sub>2</sub> = 140 mbar. **g)** same as *f* but for pCO<sub>2</sub> = 220 mbar. **h)** same as *b* but for  $\alpha = 0.57$  and pCO<sub>2</sub> = 0.4 mbar. **i)** same as *h* but for pCO<sub>2</sub> = 0.20 mbar. The simulations were carried out using the MPI-ESM1.2<sup>1</sup> with prescribed surface albedos (see sec. M1, M2). The grey boxes in sub-figures *b-i* indicate the location of the latitudinal band where the maximum ablation rates are simulated. Note that color shading in panels *b-i* have variable ranges.

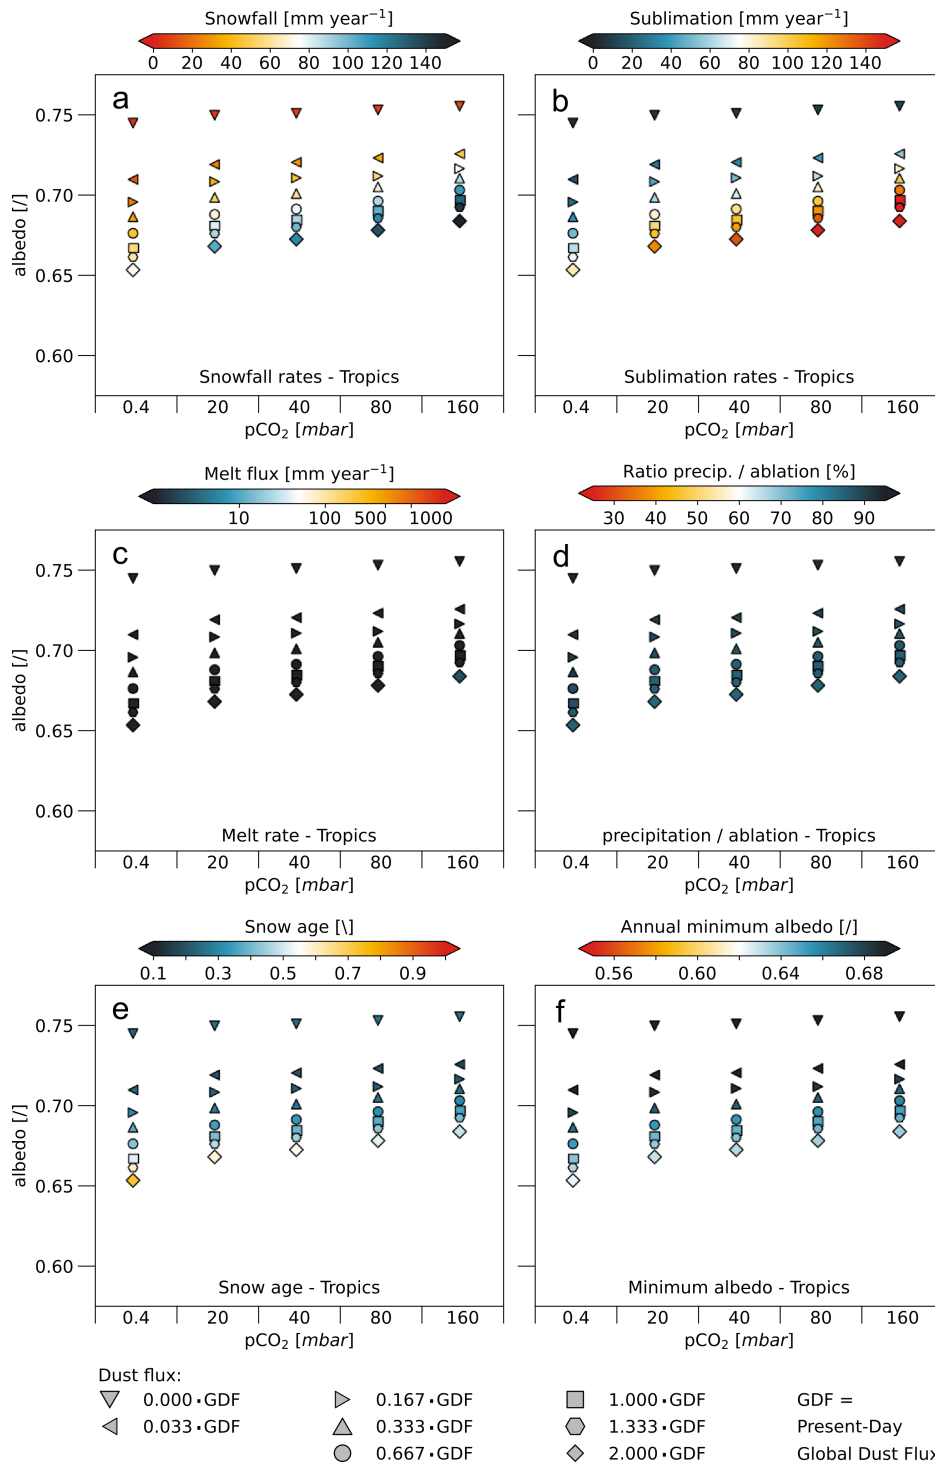

### Supplementary Figure 2. Surface dynamics in the tropics for varying dust deposition rates and CO<sub>2</sub> levels

**a)** Simulated annual mean snowfall rates in the tropical ablation zone as a function of pCO<sub>2</sub>, dust deposition fluxes and the resulting annual mean albedo. The values are representative for a 18.75°-wide latitudinal band in the equatorial regions between roughly 10.°N and 10.°S. **b)** Same as **a** but for sublimation. **c)** Same as **a** but for snow and ice melt. **d)** Same as **a** but for the ratio of precipitation and ablation, i.e. the sum of sublimation and melt flux. **e)** Same as **a** but for snow age, i.e. average of the snow ages of the main and the top-layer, weighted by the fraction that is exposed to the atmosphere. Note that the snow age is a dimensionless factor, where an age of 0 corresponds to fresh snow and an age of 1 to old, darkened snow. **f)** Same as **a** but showing the annual minimum albedo (monthly mean). The simulations were carried out using the MPI-ESM1.2<sup>1</sup> with an adapted snow-albedo scheme that estimates the albedo based on snow-age and surface temperatures and separates the snowpack into a top- and a main-layer (see sec. M1, M2).

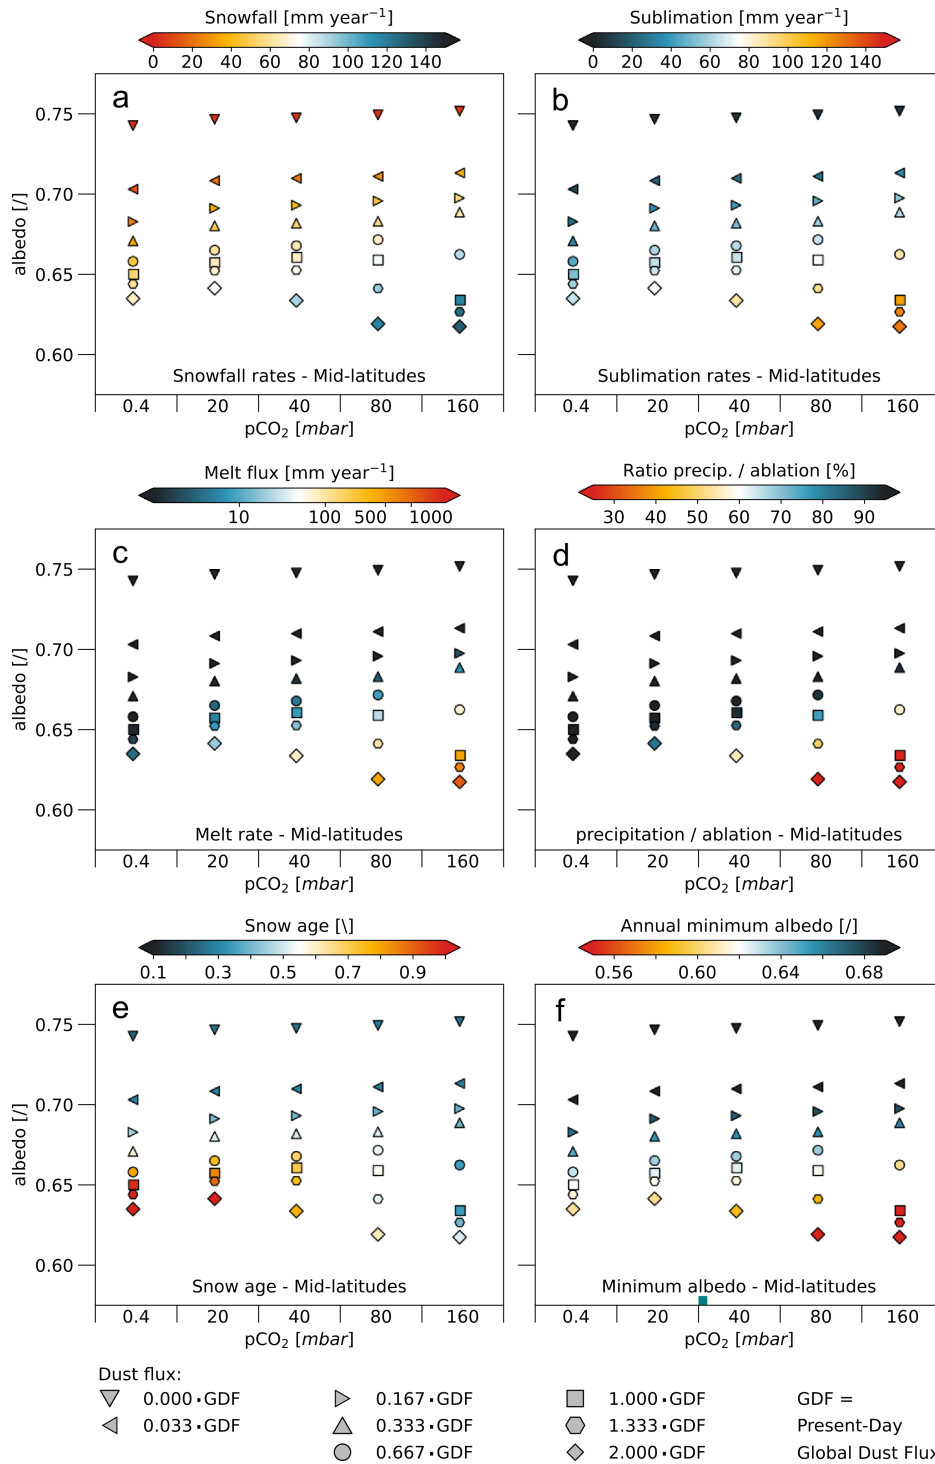

**Supplementary Figure 3. Surface dynamics in the extratropics for varying dust deposition rates and CO<sub>2</sub> levels**  
 Same as figure 2, but showing values representative of an 18.75°-wide latitudinal band roughly between 30.°S and 50.°S.

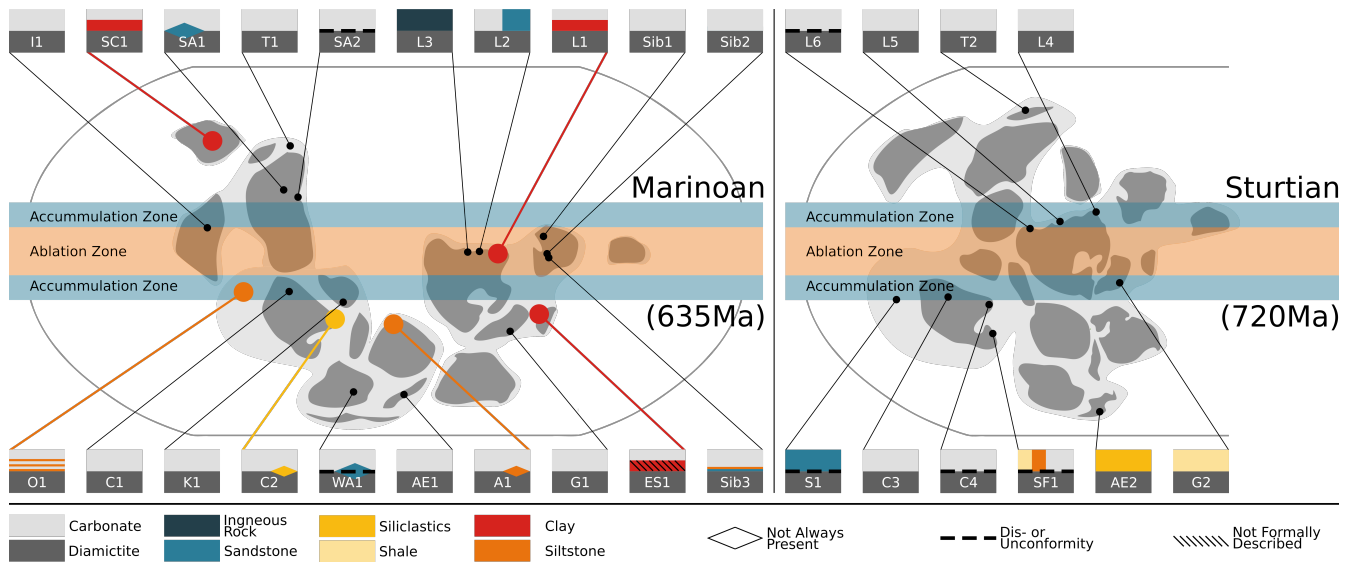

#### Supplementary Figure 4. Observed clay drapes

From 30 well-studied snowball Earth field sites for which detailed stratigraphic information is available or the boundaries between glacial and postglacial formations have explicitly been described, only two exhibit distinct clay deposits between the characteristic diamictite and overlying carbonate layers. One of these sites is located at the Marinoan paleoequator (L1), the other around 45° (SC1). One more occurrence of clay drapes, at around 30° (ES1), was reported, but never formally described in the peer reviewed literature. Thus, only one reported occurrence of a distinct clay layer can be placed within the latitudinal range that models identified as the tropical ablation zone, i.e. below 10°<sup>2</sup>, while one, possibly two, occurrences are located even beyond the main accumulation zones that extend between roughly 10° and 20°. When assuming that dust might present itself as a thin siltstone layer or inter-bedded silt-carbonate structures, two more sites, at 15° (O1) and 30° (A1), may indicate pronounced dust-flushings during deglaciation, none of which likely occurred within the tropical ablation zone. Several studies have identified discrete ash depositions within the glacial stratifications and at least at one of these sites the ash presents itself as a widespread layer close to the glacial-postglacial boundary (C2). There are other instances where the diamictite is topped by either siltstone (SF1), shale (SF1, G2) or fine siliclastics (AE2); however in these instances the layers are very thick and there is no cap carbonate, making it extremely unlikely that they are the result of deglaciation dust-fluxes. While it is not impossible that in some instances clay layers went unreported, most of the studies either describe the boundary between diamictite and cap carbonate as very sharp or report the presence of other materials such as sandstone or igneous rocks, making it unlikely that clay drapes were merely overlooked. Thus, if a hard snowball Earth ever existed, geological evidence does not strongly indicate the presence of extensive clay drapes, which suggests that a thick dust layer in the tropical ablation zone may not have occurred. Note that the above maps are based on Li et al. (2013)<sup>3</sup> and Hoffman et al. (2017)<sup>4</sup> and an overview over the reviewed publications is provided in the table 1.

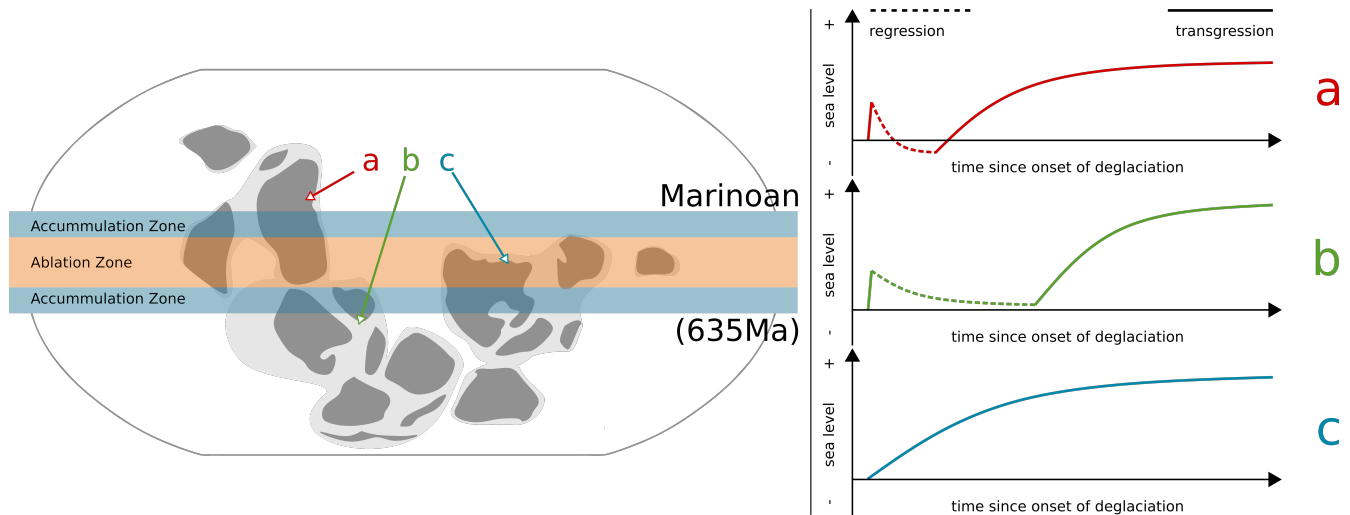

### Supplementary Figure 5. Post-glacial sea-level histories

During the process of deglaciation, the combination of isostatic rebound and the reduced gravitational attraction of the shrinking ice-sheet lowers (relative) regional sea-levels. In the early stages of the deglaciation this relative decline could have offset the effect of the meltwater-induced global rise in sea-levels, resulting in a local regression<sup>5</sup>. In the case of a spatially-variable deglaciation this would result in pronounced regional differences in the syndeglaciation sea-level curves. Regions with an early onset of deglaciation would show an initial regression followed by a transgression, while those regions where deglaciation starts relatively late exhibit a rise in sea-levels which is either continuous or interrupted by a regression at a later stage. For panels a-c, we adapted schematic sea-level curves from Creveling and Mitrovica (2014)<sup>6</sup>, based upon stratigraphic sequences of the Marinoan deglaciation. Site a is an extratropical site located in present-day South Australia<sup>7,8</sup>, site b a subtropical site on the Congo craton<sup>5</sup> and site c is located in the tropical ablation zone on the Laurentia craton<sup>9</sup> – the locations of the respective sites are indicated in the left panel of the figure. The post-glacial sea-level histories of these sites are consistent with (but not necessarily unique to) a deglaciation that was triggered outside of the tropical ablation zone, with both the extra-tropical sites showing an initial regression<sup>7</sup>, consistent with the initiation of deglaciation in the mid-latitudes, whereas the tropical site merely shows a sustained transgression, consistent with a delayed onset of deglaciation<sup>6,10</sup>. However, a number of additional factors will modify when and where sea-level rises during the deglaciation and other potential reasons exist that could explain the particular sea-level histories, such as the sites' position relative to the neighboring continental ice sheet or spatial differences in ice sheet thickness. Thus a true test of our deglaciation-hypothesis requires a much more comprehensive knowledge of post-glacial sea levels including a better constraint on the relative timing of transgressive and regressive sequences.

| Site | Lat.-Range [°] | Country                | Craton             | References                                                                                                             |
|------|----------------|------------------------|--------------------|------------------------------------------------------------------------------------------------------------------------|
| A1   | 25 - 35        | Brazil (Paraguay Belt) | Amazonia           | Alvarenga et al. (2004,2008,2011) <sup>11-13</sup>                                                                     |
| AE1  | 55 - 65        | Scotland               | Avalonia (east)    | McCay et al. (2006) <sup>14</sup> ; Arnaud and Eyles (2006) <sup>15</sup> ; Prave and Fallick (2011) <sup>16</sup>     |
| AE2  | 60 - 70        | Scotland               | Avalonia (east)    | McCay et al. (2006) <sup>14</sup> ; Arnaud and Eyles (2006) <sup>15</sup> ; Prave and Fallick (2011) <sup>16</sup>     |
| C1   | 15 - 25        | Dem. Rep. of Congo     | Congo              | Master and Wendorf (2011) <sup>17</sup>                                                                                |
| C2   | 25 - 35        | Namibia                | Congo              | Hoffman et al. (1998,2011) <sup>18,19</sup> ; Hoffmann et al. (2004) <sup>20</sup> ; Prave et al. (2016) <sup>21</sup> |
| C3   | 15 - 25        | Dem. Rep. of Congo     | Congo              | Master and Wendorf (2011) <sup>17</sup>                                                                                |
| C4   | 20 - 30        | Namibia                | Congo              | Le Heron et al. (2012) <sup>22</sup>                                                                                   |
| ES1  | 25 - 35        | Norway (Svalbard)      | East Svalbard      | Halverson et al. (2004) <sup>23</sup> ; Abbot and Pierrehumbert (2010) <sup>24</sup>                                   |
| G1   | 30 - 40        | Greenland              | Greenland          | Stouge et al. (2011) <sup>25</sup>                                                                                     |
| G2   | 30 - 40        | Greenland              | Greenland          | Stouge et al. (2011) <sup>25</sup>                                                                                     |
| I1   | 5 - 15         | India                  | India              | Jiang et al. (2003) <sup>26</sup> ; Etienne et al.(2011) <sup>27</sup>                                                 |
| K1   | 25 - 35        | Namibia/South Africa   | Kalahari           | Frimmel et al. (2002) <sup>28</sup>                                                                                    |
| L1   | 0 - 10         | Canada                 | Laurentia          | Hoffman and Halverson (2011) <sup>9</sup>                                                                              |
| L2   | 0 - 10         | Canada                 | Laurentia          | McMechan (2000) <sup>29</sup> ; Smith et al. (2011) <sup>30</sup>                                                      |
| L3   | 0 - 10         | Canada                 | Laurentia          | Kendall et al. (2004) <sup>31</sup> ; Smith et al. (2011) <sup>30</sup>                                                |
| L4   | 5 - 15         | USA (Death Valley)     | Laurentia          | Prave (1999) <sup>32</sup> ; Peterson et al. (2011) <sup>33</sup> ; Macdonald et al. (2013) <sup>34</sup>              |
| L5   | 5 - 15         | USA (Idaho)            | Laurentia          | Fanning and Link (2004) <sup>35</sup>                                                                                  |
| L6   | 5 - 15         | USA (Alaska)           | Laurentia          | Macdonald (2011) <sup>36</sup>                                                                                         |
| O1   | 10 - 20        | Oman                   | Oman               | Allen et al. (2004,2011) <sup>37,38</sup> ; Kilner et al. (2005) <sup>39</sup>                                         |
| S1   | 10 - 20        | Ethiopia               | Sahara             | Miller et al. (2011) <sup>40</sup>                                                                                     |
| SA1  | 15 - 25        | Australia              | Southern Australia | Williams et al. (2008) <sup>41</sup>                                                                                   |
| SA2  | 15 - 25        | Tasmania               | Southern Australia | Hoffman et al. (2009) <sup>42</sup> ; Calver et al. (2011,2013) <sup>43,44</sup>                                       |
| SC1  | 40 - 50        | China                  | South China        | Zhang et al. (2008) <sup>45</sup> ; Zhang et al. (2011) <sup>46</sup> ; Hoffman and Li (2009) <sup>47</sup>            |
| SF1  | 30 - 40        | Brazil (Sao Francisco) | Sao Francisco      | Uhlein et al. (1999,2011) <sup>48,49</sup>                                                                             |
| Sib1 | 0 - 10         | Siberia                | Siberia            | Sovetov (2011) <sup>50</sup>                                                                                           |
| Sib2 | 0 - 10         | Siberia                | Siberia            | Chumakov (2011) <sup>51</sup>                                                                                          |
| Sib3 | 0 - 10         | Siberia                | Siberia            | Chumakov (2011) <sup>52</sup>                                                                                          |
| T1   | 40 - 50        | Mongolia               | Tarim              | Macdonald et al. (2009) <sup>53</sup>                                                                                  |
| T2   | 40 - 50        | Mongolia               | Tarim              | Macdonald et al. (2009) <sup>53</sup>                                                                                  |
| WA1  | 55 - 65        | Algeria/Mali           | West Africa        | Shields-Zhou et al. (2007,2011) <sup>54,55</sup> ; Boudzoumou et al. (2011) <sup>56</sup>                              |

**Supplementary Table 1.** Overview over the publications that were reviewed in order to identify snowball Earth field sites that feature distinct clay drapes at the glacial-postglacial boundary. The first column gives the identifier of the site and the second the approximate latitudinal position during deglaciation (based on Li et al. (2013)<sup>3</sup> and Hoffman et al. (2017)<sup>4</sup>). The third column indicates the country in which the site is located, while the fourth column indicates the craton and the last column the studies that were reviewed.



## Supplementary References

1. Mauritsen, T. *et al.* Developments in the mpi-m earth system model version 1.2 (mpi-esml2) and its response to increasing co<sub>2</sub>. *Journal of Advances in Modeling Earth Systems* **11**, 998–1038 (2019). URL <https://agupubs.onlinelibrary.wiley.com/doi/abs/10.1029/2018MS001400>. <https://agupubs.onlinelibrary.wiley.com/doi/pdf/10.1029/2018MS001400>.
2. Abbot, D. S. *et al.* Robust elements of snowball earth atmospheric circulation and oases for life. *Journal of Geophysical Research: Atmospheres* **118**, 6017–6027 (2013). URL <https://doi.org/10.1002/jgrd.50540>.
3. Li, Z.-X., Evans, D. A. & Halverson, G. P. Neoproterozoic glaciations in a revised global palaeogeography from the breakup of rodinia to the assembly of gondwanaland. *Sedimentary Geology* **294**, 219–232 (2013). URL <https://doi.org/10.1016/j.sedgeo.2013.05.016>.
4. Hoffman, P. F. *et al.* Snowball earth climate dynamics and cryogenian geology-geobiology. *Science Advances* **3**, e1600983 (2017). URL <https://doi.org/10.1126/sciadv.1600983>.
5. Hoffman, P. & Macdonald, F. Sheet-crack cements and early regression in marinoan (635 ma) cap dolostones: Regional benchmarks of vanishing ice-sheets? *Earth and Planetary Science Letters* **300**, 374–384 (2010).
6. Creveling, J. R. & Mitrovica, J. X. The sea-level fingerprint of a snowball earth deglaciation. *Earth and Planetary Science Letters* **399**, 74–85 (2014). URL <http://www.sciencedirect.com/science/article/pii/S0012821X14002696>.
7. Rose, C. V. & Maloof, A. C. Testing models for post-glacial ‘cap dolostone’ deposition: Nuccaleena formation, south australia. *Earth and Planetary Science Letters* **296**, 165–180 (2010). URL <http://www.sciencedirect.com/science/article/pii/S0012821X10002128>.
8. Rose, C. V. *et al.* The end-cryogenian glaciation of south australia. *Geoscience Canada* **40**, 256–293 (2013). URL <https://journals.lib.unb.ca/index.php/GC/article/view/20099>.
9. Hoffman, P. F. & Halverson, G. P. Chapter 36 neoproterozoic glacial record in the mackenzie mountains, northern canadian cordillera. *Geological Society, London, Memoirs* **36**, 397–412 (2011). URL <https://doi.org/10.1144/m36.36>.
10. Creveling, J. R., Bergmann, K. D. & Grotzinger, J. P. Cap carbonate platform facies model, Noonday Formation, SE California. *GSA Bulletin* **128**, 1249–1269 (2016). URL <https://doi.org/10.1130/B31442.1>. <https://pubs.geoscienceworld.org/gsabulletin/article-pdf/128/7-8/1249/3413362/1249.pdf>.
11. de Alvarenga, C. J., Santos, R. V. & Dantas, E. L. C–o–sr isotopic stratigraphy of cap carbonates overlying marinoan-age glacial diamictites in the paraguay belt, brazil. *Precambrian Research* **131**, 1–21 (2004). URL <https://doi.org/10.1016/j.precamres.2003.12.006>.
12. de Alvarenga, C. J. *et al.* Isotope stratigraphy of neoproterozoic cap carbonates in the araras group, brazil. *Gondwana Research* **13**, 469–479 (2008). URL <https://doi.org/10.1016/j.gr.2007.05.004>.
13. Alvarenga, C. J. S. *et al.* Chapter 45 glacially influenced sedimentation of the puga formation, cuiabá group and jacadigo group, and associated carbonates of the araras and corumbá groups, paraguay belt, brazil. *Geological Society, London, Memoirs* **36**, 487–497 (2011). URL <https://doi.org/10.1144/m36.45>.
14. McCay, G., Prave, A., Alsop, G. & Fallick, A. Glacial trinity: Neoproterozoic earth history within the british-irish caledonides. *Geology* **34**, 909 (2006). URL <https://doi.org/10.1130/g22694a.1>.
15. Arnaud, E. & Eyles, C. H. Neoproterozoic environmental change recorded in the port askaig formation, scotland: Climatic vs tectonic controls. *Sedimentary Geology* **183**, 99–124 (2006). URL <https://doi.org/10.1016/j.sedgeo.2005.09.014>.
16. Prave, A. R. & Fallick, A. E. Chapter 63 the neoproterozoic glaciogenic deposits of scotland and ireland. *Geological Society, London, Memoirs* **36**, 643–648 (2011). URL <https://doi.org/10.1144/m36.63>.
17. Master, S. & Wendorff, M. Chapter 12 neoproterozoic glaciogenic diamictites of the katanga supergroup, central africa. *Geological Society, London, Memoirs* **36**, 173–184 (2011). URL <https://doi.org/10.1144/m36.12>.
18. Hoffman, P. F., Halverson, G. P., Schrag, D. P. & Kaufman, A. J. A neoproterozoic snowball earth. *Science* **281**, 1342–1346 (1998). URL <https://doi.org/10.1126/science.281.5381.1342>.
19. Hoffman, P. F. Chapter 2 a history of neoproterozoic glacial geology, 1871–1997. *Geological Society, London, Memoirs* **36**, 17–37 (2011). URL <https://doi.org/10.1144/m36.2>.



20. Hoffmann, K.-H., Condon, D., Bowring, S. & Crowley, J. U-pb zircon date from the neoproterozoic ghaub formation, namibia: Constraints on marinoan glaciation. *Geology* **32**, 817 (2004). URL <https://doi.org/10.1130/g20519.1>.
21. Prave, A. R., Condon, D. J., Hoffmann, K. H., Tapster, S. & Fallick, A. E. Duration and nature of the end-cryogenian (marinoan) glaciation. *Geology* **44**, 631–634 (2016). URL <https://doi.org/10.1130/g38089.1>.
22. Le Heron, D. P., Busfield, M. E. & Kamona, F. G. R. An interglacial on snowball earth? dynamic ice behaviour revealed in the chuos formation, namibia. *Sedimentology* **60**, 411–427 (2012). URL <https://doi.org/10.1111/j.1365-3091.2012.01346.x>.
23. Halverson, G. P., Maloof, A. C. & Hoffman, P. F. The marinoan glaciation (neoproterozoic) in northeast svalbard. *Basin Research* **16**, 297–324 (2004). URL <https://doi.org/10.1111/j.1365-2117.2004.00234.x>.
24. Abbot, D. S. & Pierrehumbert, R. T. Mudball: Surface dust and snowball earth deglaciation. *Journal of Geophysical Research* **115**, D03104 (2010). URL <https://doi.org/10.1029/2009jd012007>.
25. Stouge, S. *et al.* Chapter 56 neoproterozoic (cryogenian–ediacaran) deposits in east and north-east greenland. *Geological Society, London, Memoirs* **36**, 581–592 (2011). URL <https://doi.org/10.1144/m36.56>.
26. Jiang, G., Sohl, L. E. & Christie-Blick, N. Neoproterozoic stratigraphic comparison of the lesser himalaya (india) and yangtze block (south china): Paleogeographic implications. *Geology* **31**, 917 (2003). URL <https://doi.org/10.1130/g19790.1>.
27. Etienne, J. L. *et al.* Chapter 31 the blaini formation of the lesser himalaya, NW india. *Geological Society, London, Memoirs* **36**, 347–355 (2011). URL <https://doi.org/10.1144/m36.31>.
28. Frimmel, H., Fölling, P. & Eriksson, P. G. Neoproterozoic tectonic and climatic evolution recorded in the gariep belt, namibia and south africa. *Basin Research* **14**, 55–67 (2002).
29. McMechan, M. Vreeland diamictites - neoproterozoic glaciogenic slope deposits, rocky mountains, northeast british columbia. *Bulletin of Canadian Petroleum Geology* **48**, 246–261 (2000). URL <https://doi.org/10.2113/48.3.246>.
30. Smith, M. D., Arnaud, E., Arnott, R. & Ross, G. M. Chapter 37 the record of neoproterozoic glaciations in the windermere supergroup, southern canadian cordillera. *Geological Society, London, Memoirs* **36**, 413–424 (2011). URL <https://doi.org/10.1144/m36.37>.
31. Kendall, B. S., Creaser, R. A., Ross, G. M. & Selby, D. Constraints on the timing of marinoan “snowball earth” glaciation by 187re–187os dating of a neoproterozoic, post-glacial black shale in western canada. *Earth and Planetary Science Letters* **222**, 729–740 (2004). URL <https://doi.org/10.1016/j.epsl.2004.04.004>.
32. Prave, A. R. Two diamictites, two cap carbonates, two  $\Delta^{13}C$  excursions, two rifts: The neoproterozoic kingston peak formation, death valley, california. *Geology* **27**, 339 (1999). URL [https://doi.org/10.1130/0091-7613\(1999\)027<0339:tdtcct>2.3.co;2](https://doi.org/10.1130/0091-7613(1999)027<0339:tdtcct>2.3.co;2).
33. Petterson, R., Prave, A. R., Wernicke, B. P. & Fallick, A. E. The neoproterozoic noonday formation, death valley region, california. *Geological Society of America Bulletin* **123**, 1317–1336 (2011). URL <https://doi.org/10.1130/b30281.1>.
34. Macdonald, F. A. *et al.* The Laurentian record of Neoproterozoic glaciation, tectonism, and eukaryotic evolution in Death Valley, California. *GSA Bulletin* **125**, 1203–1223 (2013). URL <https://doi.org/10.1130/B30789.1>. <https://pubs.geoscienceworld.org/gsabulletin/article-pdf/125/7-8/1203/3715813/1203.pdf>.
35. Fanning, C. M. & Link, P. K. U-pb SHRIMP ages of neoproterozoic (sturtian) glaciogenic pocatello formation, southeastern idaho. *Geology* **32**, 881 (2004). URL <https://doi.org/10.1130/g20609.1>.
36. Macdonald, F. A. Chapter 34 the hula hula diamictite and katakturuk dolomite, arctic alaska. *Geological Society, London, Memoirs* **36**, 379–388 (2011). URL <https://doi.org/10.1144/m36.34>.
37. Allen, P. A., Leather, J. & Brasier, M. D. The neoproterozoic fiq glaciation and its aftermath, huqf supergroup of oman. *Basin Research* **16**, 507–534 (2004). URL <https://doi.org/10.1111/j.1365-2117.2004.00249.x>.
38. Allen, P. A. *et al.* Chapter 20 the abu mahara group (ghubrah and fiq formations), jabal akhdar, oman. *Geological Society, London, Memoirs* **36**, 251–262 (2011). URL <https://doi.org/10.1144/m36.20>.
39. Kilner, B., Niocaill, C. & Brasier, M. Low-latitude glaciation in the neoproterozoic of oman. *Geology* **33**, 413 (2005). URL <https://doi.org/10.1130/g21227.1>.

40. Miller, N. R., Avigad, D., Stern, R. J. & Beyth, M. Chapter 21 the tambien group, northern ethiopia (tigre). *Geological Society, London, Memoirs* **36**, 263–276 (2011). URL <https://doi.org/10.1144/m36.21>.
41. Williams, G. E., Gostin, V. A., McKirdy, D. M. & Preiss, W. V. The elatina glaciation, late cryogenian (marinoan epoch), south australia: Sedimentary facies and palaeoenvironments. *Precambrian Research* **163**, 307–331 (2008). URL <https://doi.org/10.1016/j.precamres.2007.12.001>.
42. Hoffman, P. F., Calver, C. R. & Halverson, G. P. Cottons breccia of king island, tasmania: Glacial or non-glacial, cryogenian or ediacaran? *Precambrian Research* **172**, 311–322 (2009). URL <https://doi.org/10.1016/j.precamres.2009.06.003>.
43. Calver, C. R. Chapter 64 neoproterozoic glacial deposits of tasmania. *Geological Society, London, Memoirs* **36**, 649–658 (2011). URL <https://doi.org/10.1144/m36.64>.
44. Calver, C. *et al.* Globally synchronous marinoan deglaciation indicated by u-pb geochronology of the cottons breccia, tasmania, australia. *Geology* **41**, 1127–1130 (2013). URL <https://doi.org/10.1130/g34568.1>.
45. Zhang, S., Jiang, G. & Han, Y. The age of the nantuo formation and nantuo glaciation in south china. *Terra Nova* **20**, 289–294 (2008). URL <https://doi.org/10.1111/j.1365-3121.2008.00819.x>.
46. Zhang, Q.-R., Chu, X.-L. & Feng, L.-J. Chapter 32 neoproterozoic glacial records in the yangtze region, china. *Geological Society, London, Memoirs* **36**, 357–366 (2011). URL <https://doi.org/10.1144/m36.32>.
47. Hoffman, P. F. & Li, Z.-X. A palaeogeographic context for neoproterozoic glaciation. *Palaeogeography, Palaeoclimatology, Palaeoecology* **277**, 158–172 (2009). URL <https://doi.org/10.1016/j.palaeo.2009.03.013>.
48. Uhlein, A., Trompette, R. R. & Alvarenga, C. J. Neoproterozoic glacial and gravitational sedimentation on a continental rifted margin: The jequitai–macaubas sequence (minas gerais, brazil). *Journal of South American Earth Sciences* **12**, 435–451 (1999). URL [https://doi.org/10.1016/s0895-9811\(99\)00032-2](https://doi.org/10.1016/s0895-9811(99)00032-2).
49. Uhlein, A., Alvarenga, C. J. S., Dardenne, M. A. & Trompette, R. R. Chapter 51 the glaciogenic jequitai formation, southeastern brazil. *Geological Society, London, Memoirs* **36**, 541–546 (2011). URL <https://doi.org/10.1144/m36.51>.
50. Sovetov, J. K. Chapter 28 late cryogenian (vendian) glaciogenic deposits in the marnya formation, oselok group, in the foothills of the east sayan range, southwestern siberian craton. *Geological Society, London, Memoirs* **36**, 317–329 (2011). URL <https://doi.org/10.1144/m36.28>.
51. Chumakov, N. M., Pokrovsky, B. G. & Melezhik, V. A. Chapter 27 the glaciogenic bol’shoy patom formation, lena river, central siberia. *Geological Society, London, Memoirs* **36**, 309–316 (2011). URL <https://doi.org/10.1144/m36.27>.
52. Chumakov, N. M. Chapter 25 glacial deposits of the nichatka formation, chara river basin and review of upper precambrian diamictites of central siberia. *Geological Society, London, Memoirs* **36**, 297–302 (2011). URL <https://doi.org/10.1144/m36.25>.
53. Macdonald, F. A., Jones, D. S. & Schrag, D. P. Stratigraphic and tectonic implications of a newly discovered glacial diamictite–cap carbonate couplet in southwestern mongolia. *Geology* **37**, 123–126 (2009). URL <https://doi.org/10.1130/g24797a.1>.
54. Shields, G. A. *et al.* Neoproterozoic glaciomarine and cap dolostone facies of the southwestern taoudéni basin (walidiala valley, senegal/guinea, NW africa). *Comptes Rendus Geoscience* **339**, 186–199 (2007). URL <https://doi.org/10.1016/j.crte.2006.10.002>.
55. Shields-Zhou, G. A., Deynoux, M. & Och, L. Chapter 11 the record of neoproterozoic glaciation in the taoudéni basin, NW africa. *Geological Society, London, Memoirs* **36**, 163–171 (2011). URL <https://doi.org/10.1144/m36.11>.
56. Boudzoumou, F., Vandamme, D., Affaton, P. & Gattacceca, J. Neoproterozoic paleomagnetic poles in the taoudeni basin (west africa). *Comptes Rendus Geoscience* **343**, 284–294 (2011). URL <https://doi.org/10.1016/j.crte.2010.12.001>.
